# Supplementary material
Source: publisher site journal article supplement (https://www.dovepress.com/article/567563)
Supplement: Supplementary file 1 [file 567563%20Table%20S1.docx]

| Strain IDs | MLST | Source | Country | Isolation year | Resistance genes | Virulence  genes |
| --- | --- | --- | --- | --- | --- | --- |
| GCA_029839485 | / | Sink | / | 2018 | *oprZ,*  *axyY,*  *axyX,*  *cmlA9,*  *tet(G),*  *qacEdelta1,*  *aadA2,*  *ereA,*  *dfrA32,*  *mphF,*  *aph(3')-Via,*  *sul1* | *brkB* |
| L3024hy | ST143 | Stool | China | 2020 | *oprZ, axyY, axyX, amf-1,*  *brp*(MBL) | *brkB* |
| GCA_943737025 | ST429 | / | / | / | *oprZ,*  *axyY,*  *axyX* | *brkB* |
| GCA_001312205 | / | / | / | / | */* | *brkB* |
| GCA_014353695 | / | Mine soil | China | 2018 | *oprZ,*  *axyY,*  *axyX* | *brkB* |
| GCA_014529725 | / | Mine soil | China | 2018 | *oprZ,*  *axyY,*  *axyX* | *brkB* |
| GCA_014490035 | / | Soil | China | 2013 | *oprZ,*  *axyY,*  *axyX* | *brkB* |
| GCA_003503255 | / | Soil | China | 2013 | *oprZ,*  *axyY,*  *axyX* | *brkB* |

Table S1. Detailed information of the *Achromobacter sp.* sequences in this study
